# Supplementary material for: All-inorganic ferric wheel based on hexaniobate-anion linkers
Source: Royal Society of Chemistry journal article supplement (doi:10.1039/d2dt00971d), 2022-01-01
Supplement: d2dt00971d1.pdf [file d2dt00971d1.pdf]

## Electronic Supplementary Information

For

### All-inorganic ferric wheel based on hexaniobate-anion linkages

*Mark Baranov<sup>†,a</sup>, Libi Polin<sup>†,a</sup>, Nitai Leffler<sup>a</sup>, Gregory Leitius<sup>b</sup>, Alexander I. Shames<sup>c</sup> and Ira A.*

*Weinstock<sup>\*,a</sup>*

<sup>a</sup>Department of Chemistry and the Ilse Katz Institute for Nanoscale Science & Technology, Ben-Gurion University of the Negev, Beer Sheva, 84105, Israel

<sup>b</sup>Chemical Research Support Unit, Weizmann Institute of Science, Rehovot 76100, Israel

<sup>c</sup>Department of Physics, Ben-Gurion University of the Negev, Beer Sheva 84105, Israel

† These authors have contributed equally to the work.

## EXPERIMENTAL SECTION

**Instruments and materials.** All chemicals were of the reagent grade purity. Type I micropure standard water (18.2  $\Omega\cdot\text{cm}$ ), Lithium hydroxide (LiOH, 98%, solid, Sigma Aldrich); Iron (III) chloride ( $\text{FeCl}_3$ , yellow solid, Alfa Aesar Holland); Lithium perchlorate anhydrous ( $\text{LiClO}_4$ , crystalline, Holland Moran).  $\text{Li}_8\text{Nb}_6\text{O}_{19}\cdot 22\text{H}_2\text{O}$  was prepared using a published method.<sup>1</sup> We have used the lithium salt due to its low solubility, the salt slowly dissolves into the solution upon addition of  $\text{Fe}^{3+}$  and its subsequent complexation by hexaniobate, thus allowing us to kinetically regulate the reaction through the inherent solubility properties of the salt.

**X-Ray diffraction analysis-** The complex was mounted on a Rigaku XtalLAB Synergy single crystal x-ray diffractometer, which includes a Pilatus detector and a standard Cu  $K\alpha$  x-ray radiation source ( $\lambda = 1.51418 \text{ \AA}$ ). Unit cell dimensions, space group assignment, data reduction and finalization were done by using the CrysAlis PRO software package.<sup>2</sup> A total of 128352 reflections were collected, of which 31875 were used after merging by SHELXL<sup>3</sup> according to the crystal class and based on Friedel pair equivalency for structure solution. Numerical absorption correction based on gaussian integration over a multifaceted crystal model and empirical absorption correction was done using spherical harmonics.<sup>4</sup> The structure was solved in the orthorhombic *Pccn* space group (no. 56) by SHELXT<sup>5</sup> via intrinsic phasing and refined by SHELXL using a full-matrix least-squares. Due to solvent disorder the SQUEEZE command (solvent mask) was used for a volume of 8202  $\text{\AA}^3$ , for an equivalent of 246  $e^-$  per asymmetric unit, which is consistent with a presence of 32  $\text{H}_2\text{O}$  molecules per unit formula (for a total of 88  $\text{H}_2\text{O}$  solvent molecules, later confirmed by elemental analysis). Additionally, two Nb positions are disordered within the structure due to thermal motion, with partial occupancies of 26:74. CCDC deposition number: 2075364.

**pH Measurements-** pH values were measured using a Thermo SCIENTIFIC, ORION STAR A211 pH meter, or a EUTECH INSTRUMENTS, cyberscan pH 11 pH/ mv/  $^\circ\text{C}$  Meter. Prior to use, the pH meter was calibrated using standard reference solutions (pH 4.01, 7.00 and 10.01).

**Elemental analysis** - Elemental analysis of the metal content (Li, Nb and Fe) was performed using a SPECTRO ACROS ICP-OES analyzer calibrated using standard solutions of the respective elements. Elemental analysis of oxygen and hydrogen was performed using a Thermo Scientific Flash Smart OEA 2000 elemental analyzer, with water content determined directly as  $\text{H}_2\text{O}$  gas and the remaining O content determined using nickel coated carbon to quantitatively yield CO while reducing the metal content.

**FTIR spectroscopy**- The FT-IR spectra were acquired using a Nicolet Impact 410 spectrophotometer (KBr pellets), analyzed with Omnic 7 software in transmission mode.

**Magnetic susceptibility** - Measurements were carried out using a MPMS3 (LOT-Quantum Design inc.) SQUID-magnetometer. Sample mass: 6.6 mg. Measurements were performed by VSM (vibrating sampling magnetometry) mode using peak amplitude 5mm; frequency 13 Hz; Averaging time 5 s. Chemical formula applied during calculations:  $\text{Li}_6\text{Nb}_6\text{Fe}_1\text{O}_{27}$  (1  $\text{Fe}^{3+}$  equimolar formula, molecular weight =1086.9128 g/mol). Pascal coefficients sum  $\chi_0 = -1.942 \cdot 10^{-4} \text{ cm}^3 \text{ mol}^{-1}$ .

**Electron paramagnetic resonance** - Continuous wave X-band (9.4 GHz) EPR measurements were carried out using a Bruker EMX - 220 spectrometer (Bruker Scientific Israel Ltd., Rehovot, Israel) installed at the Ben-Gurion University of the Negev (Israel) and equipped with a 53150A frequency counter (Agilent Technologies Inc., Santa Clara, CA) and an Oxford Instruments ESR900 variable temperature accessory (Oxford Instruments plc, Tubney Woods, UK). EPR measurements were done within the temperature region  $5 \text{ K} \leq T \leq 300 \text{ K}$ . EPR data processing and fittings were carried out using WIN-EPR (Bruker), EasySpin,<sup>6</sup> and OriginLab (OriginLab Corporation, Northampton, MA) software packages.

**Table S1. Crystal Data and Structure Refinement Details of 1**

|                                                                            |                                                                                                                                                                                                                                                                                           |
|----------------------------------------------------------------------------|-------------------------------------------------------------------------------------------------------------------------------------------------------------------------------------------------------------------------------------------------------------------------------------------|
| <b>Crystal data</b>                                                        |                                                                                                                                                                                                                                                                                           |
| Chemical Formula                                                           | Li <sub>48</sub> [(Nb <sub>6</sub> O <sub>19</sub> ) <sub>8</sub> Fe <sub>8</sub> (OH) <sub>8</sub> ]·88H <sub>2</sub> O                                                                                                                                                                  |
| $M_r$ (g·mol <sup>-1</sup> )                                               | 9392.82                                                                                                                                                                                                                                                                                   |
| Crystal system, space group                                                | Orthorhombic, <i>Pccn</i>                                                                                                                                                                                                                                                                 |
| Temperature                                                                | 100                                                                                                                                                                                                                                                                                       |
| Radiation type, $\lambda$ (Å)                                              | Cu $K_\alpha$ , 1.51418                                                                                                                                                                                                                                                                   |
| $a, b, c$ (Å)                                                              | 22.5729 (6), 32.4190 (3), 43.4373 (5)                                                                                                                                                                                                                                                     |
| $V$ (Å <sup>3</sup> )                                                      | 31787.0 (10)                                                                                                                                                                                                                                                                              |
| $\mu$ (mm <sup>-1</sup> )                                                  | 17.12                                                                                                                                                                                                                                                                                     |
| $Z$                                                                        | 4                                                                                                                                                                                                                                                                                         |
| $\rho_{\text{calcd}}$ (g·cm <sup>-3</sup> )                                | 1.957                                                                                                                                                                                                                                                                                     |
| <b>Data collection</b>                                                     |                                                                                                                                                                                                                                                                                           |
| Diffraction                                                                | Rigaku Oxford Diffraction XtaLAB Synergy, Dualflex, Pilatus                                                                                                                                                                                                                               |
| Absorption correction                                                      | Gaussian, <i>CrysAlis PRO</i> 1.171.40.68a. {Rigaku, 2018 #22} Numerical absorption correction using a multifaceted crystal model based on gaussian integration. Empirical absorption correction using spherical harmonics, implemented in SCALE3 ABSPACK scaling algorithm. <sup>4</sup> |
| $T_{\text{min}}, T_{\text{max}}$                                           | 0.366, 1.000                                                                                                                                                                                                                                                                              |
| No. of measured, independent and observed [ $I > 2\sigma(I)$ ] reflections | 128352, 31875, 24542                                                                                                                                                                                                                                                                      |
| $R_{\text{int}}$                                                           | 0.079                                                                                                                                                                                                                                                                                     |
| $(\sin \theta/\lambda)_{\text{max}}$ (Å <sup>-1</sup> )                    | 0.625                                                                                                                                                                                                                                                                                     |
| <b>Refinement</b>                                                          |                                                                                                                                                                                                                                                                                           |
| $R[F^2 > 2\sigma(F^2)], wR(F^2), S$                                        | 0.077, 0.248, 1.09                                                                                                                                                                                                                                                                        |
| No. of reflections                                                         | 31875                                                                                                                                                                                                                                                                                     |
| No. of parameters                                                          | 1449                                                                                                                                                                                                                                                                                      |
| $\Delta\rho_{\text{max}}, \Delta\rho_{\text{min}}$ (e·Å <sup>-3</sup> )    | 1.94, -1.66                                                                                                                                                                                                                                                                               |
| Weighting scheme                                                           | $w = 1/[\sigma^2(F_o^2) + (0.1707P)^2 + 31.9223P]$<br>where $P = (F_o^2 + 2F_c^2)/3$                                                                                                                                                                                                      |

Symmetry codes: (i)  $x, y, z$ , (ii)  $\frac{1}{2} - x, y, \frac{1}{2} + z$ , (iii)  $x, \frac{1}{2} - y, \frac{1}{2} + z$ , (iv)  $\frac{1}{2} + x, \frac{1}{2} + y, -z$ , (v)  $-x, -y, -z$ , (vi)  $\frac{1}{2} + x, -y, \frac{1}{2} - z$ , (vii)  $-x, \frac{1}{2} + y, \frac{1}{2} - z$ , (viii)  $\frac{1}{2} - x, \frac{1}{2} - y, z$

**Table S2. Selected Bond Lengths (Å) for 1**

| Site 1 | Site 2 | Distance  | Site 1 | Site 2 | Distance  |
|--------|--------|-----------|--------|--------|-----------|
| Nb1    | O64    | 2.053(6)  | Nb9    | O5     | 2.003(8)  |
| Nb1    | O63    | 1.940(7)  | Nb9    | O16    | 2.028(7)  |
| Nb1    | O73    | 1.920(6)  | Nb9    | O10    | 2.392(6)  |
| Nb1    | O71    | 2.070(6)  | Nb9    | O17    | 1.957(8)  |
| Nb1    | O62    | 1.814(6)  | Nb9    | O19    | 1.972(8)  |
| Nb1    | O70    | 2.335(6)  | Nb9    | O18    | 1.779(7)  |
| Nb2    | O6     | 2.040(7)  | Nb10   | O54    | 2.383(6)  |
| Nb2    | O10    | 2.395(7)  | Nb10   | O43    | 2.079(6)  |
| Nb2    | O9     | 2.026(7)  | Nb10   | O41    | 2.059(7)  |
| Nb2    | O46    | 1.972(8)  | Nb10   | O56    | 1.918(6)  |
| Nb2    | O19    | 1.964(7)  | Nb10   | O49    | 1.928(7)  |
| Nb2    | O7     | 1.757(8)  | Nb10   | O55    | 1.783(7)  |
| Nb3    | O39    | 2.164(10) | Nb11   | O33    | 2.342(7)  |
| Nb3    | O38    | 1.705(10) | Nb11   | O39    | 1.962(8)  |
| Nb3    | O35    | 1.953(10) | Nb11   | O38    | 2.103(9)  |
| Nb3    | O32    | 2.444(13) | Nb11   | O35    | 1.966(9)  |
| Nb3    | O36    | 1.617(10) | Nb11   | O32    | 1.883(11) |
| Nb4    | O54    | 2.407(6)  | Nb11   | O36    | 1.830(10) |
| Nb4    | O53    | 2.007(7)  | Nb12   | O3     | 2.068(6)  |
| Nb4    | O50    | 1.996(6)  | Nb12   | O4     | 1.807(7)  |
| Nb4    | O47    | 1.995(6)  | Nb12   | O8     | 2.044(6)  |
| Nb4    | O80    | 1.981(6)  | Nb12   | O6     | 1.916(7)  |
| Nb4    | O52    | 1.797(7)  | Nb12   | O5     | 1.935(7)  |
| Nb5    | O13    | 2.033(8)  | Nb12   | O10    | 2.357(7)  |
| Nb5    | O12    | 1.755(8)  | Fe1    | O26    | 2.081(7)  |
| Nb5    | O17    | 1.976(7)  | Fe1    | O37    | 2.144(6)  |
| Nb5    | O46    | 1.962(8)  | Fe1    | O60    | 2.103(7)  |
| Nb5    | O11    | 2.016(8)  | Fe1    | O59    | 1.951(7)  |
| Nb5    | O10    | 2.395(7)  | Fe1    | O62    | 1.962(6)  |
| Nb5    | O13    | 2.033(8)  | Fe1    | O61    | 1.905(7)  |
| Nb6    | O54    | 2.328(5)  | Fe2    | O43    | 2.072(7)  |
| Nb6    | O43    | 2.083(6)  | Fe2    | O51    | 2.119(6)  |
| Nb6    | O51    | 2.048(7)  | Fe2    | O41    | 2.089(6)  |
| Nb6    | O47    | 1.940(6)  | Fe2    | O44    | 1.974(7)  |
| Nb6    | O45    | 1.930(6)  | Fe2    | O40    | 1.945(8)  |
| Nb6    | O44    | 1.779(6)  | Fe2    | O42    | 1.892(9)  |
| Nb7    | O73    | 2.003(6)  | Fe3    | O64    | 2.180(7)  |
| Nb7    | O34    | 2.004(7)  | Fe3    | O71    | 2.090(6)  |
| Nb7    | O72    | 1.986(8)  | Fe3    | O68    | 2.063(7)  |
| Nb7    | O70    | 2.418(6)  | Fe3    | O22    | 1.953(7)  |
| Nb7    | O79    | 1.950(7)  | Fe3    | O20    | 1.952(7)  |
| Nb7    | O74    | 1.780(7)  | Fe3    | O21    | 1.915(8)  |
| Nb8    | O54    | 2.341(6)  | Fe4    | O3     | 2.075(7)  |
| Nb8    | O51    | 2.057(6)  | Fe4    | O4     | 1.959(7)  |
| Nb8    | O53    | 1.940(6)  | Fe4    | O8     | 2.137(6)  |
| Nb8    | O58    | 1.922(6)  | Fe4    | O14    | 2.120(7)  |
| Nb8    | O41    | 2.061(6)  | Fe4    | O1     | 1.967(7)  |
| Nb8    | O59    | 1.818(7)  | Fe4    | O2     | 1.926(8)  |

**Table S3. Selected Bond Angles (°) for 1**

| Site 1 | Site 2 | Site 3 | Angle     | Site 1 | Site 2 | Site 3 | Angle    |
|--------|--------|--------|-----------|--------|--------|--------|----------|
| Nb1    | O1     | Nb13   | 114.7(3)  | O11    | Nb18   | O9     | 91.7(3)  |
| Nb1    | O2     | Nb9    | 110.9(3)  | O9     | Nb18   | O8     | 89.2(3)  |
| Nb1    | O2     | Fe4    | 99.3(3)   | O9     | Nb18   | O14    | 155.9(3) |
| Nb9    | O2     | Fe4    | 99.2(3)   | O9     | Nb18   | O10    | 79.5(3)  |
| Nb2    | O3     | Fe1    | 100.0(2)  | O20    | Nb18   | O8     | 102.6(3) |
| Nb2    | O3     | Nb35   | 110.7(5)  | O20    | Nb18   | O14    | 99.8(3)  |
| Nb4    | O6     | Nb3    | 89.4(3)   | O20    | Nb18   | O10    | 177.0(3) |
| Nb4    | O6     | Nb6    | 92.7(2)   | O20    | Nb18   | O11    | 100.9(3) |
| Nb4    | O6     | Nb7    | 93.2(3)   | O20    | Nb18   | O9     | 103.5(3) |
| Nb4    | O6     | Nb8    | 91.0(3)   | O75    | Nb20   | O54    | 78.1(2)  |
| Nb4    | O6     | Nb11   | 179.0(4)  | O75    | Nb20   | O50    | 89.4(3)  |
| Nb6    | O6     | Nb3    | 88.7(2)   | O75    | Nb20   | O45    | 153.6(3) |
| Nb6    | O6     | Nb7    | 91.8(3)   | O75    | Nb20   | O49    | 87.4(3)  |
| Nb7    | O40    | Fe3    | 98.5(3)   | O45    | Nb20   | O54    | 75.7(2)  |
| Fe1    | O3     | Nb35   | 101.5(4)  | O45    | Nb20   | O49    | 84.3(3)  |
| Fe2    | O16    | Nb33   | 157.1(10) | O50    | Nb20   | O54    | 78.3(3)  |
| Fe2    | O26    | Nb31   | 96.9(6)   | O50    | Nb20   | O45    | 87.6(3)  |
| Fe2    | O53    | Nb20   | 97.3(3)   | O50    | Nb20   | O49    | 154.8(3) |
| Fe4    | O44    | Nb12   | 100.2(3)  | O72    | Nb22   | O63    | 88.2(3)  |
| O1     | Nb1    | O2     | 90.6(2)   | O72    | Nb22   | O66    | 153.7(3) |
| O1     | Nb1    | O17    | 79.0(2)   | O72    | Nb22   | O70    | 78.2(3)  |
| O2     | Nb1    | O17    | 77.0(2)   | O23    | Nb26   | O26    | 89.6(3)  |
| O38    | Nb1    | O17    | 177.8(3)  | O23    | Nb26   | O37    | 156.0(3) |
| O38    | Nb1    | O55    | 100.5(3)  | O23    | Nb26   | O33    | 79.7(3)  |
| O38    | Nb1    | O56    | 101.8(3)  | O23    | Nb26   | O38    | 92.5(3)  |
| O55    | Nb1    | O2     | 78.5(2)   | O26    | Fe1    | O37    | 76.5(3)  |
| O55    | Nb1    | O17    | 77.3(2)   | O26    | Fe1    | O60    | 76.1(3)  |
| O56    | Nb1    | O55    | 88.9(3)   | O60    | Fe1    | O37    | 76.1(3)  |
| O7     | Nb2    | Nb12   | 134.1(3)  | O59    | Fe1    | O26    | 162.8(3) |
| O7     | Nb2    | Nb18   | 134.9(3)  | O59    | Fe1    | O37    | 87.7(3)  |
| O7     | Nb2    | Nb9    | 134.8(3)  | O59    | Fe1    | O60    | 93.7(3)  |
| O7     | Nb2    | Nb5    | 135.3(3)  | O59    | Fe1    | O62    | 93.1(3)  |
| O7     | Nb2    | O6     | 102.5(4)  | O62    | Fe1    | O26    | 94.6(3)  |
| O7     | Nb2    | O10    | 179.1(4)  | O62    | Fe1    | O37    | 92.9(3)  |
| O7     | Nb2    | O9     | 103.2(3)  | O62    | Fe1    | O60    | 166.9(3) |
| O7     | Nb2    | O46    | 103.9(4)  | O61    | Fe1    | O26    | 95.9(3)  |
| O7     | Nb2    | O19    | 103.0(4)  | O61    | Fe1    | O37    | 167.3(3) |
| O5     | Nb3    | O6     | 77.4(2)   | O61    | Fe1    | O60    | 92.3(3)  |
| O43    | Nb3    | O6     | 77.8(3)   | O61    | Fe1    | O59    | 98.3(3)  |
| O47    | Nb5    | O13    | 100.7(5)  | O61    | Fe1    | O62    | 97.9(3)  |
| O47    | Nb5    | O25    | 106.9(6)  | O16    | Fe2    | O26    | 93.7(3)  |
| O74    | Nb7    | O73    | 102.9(3)  | O16    | Fe2    | O53    | 88.5(3)  |
| O74    | Nb7    | O34    | 102.7(3)  | O16    | Fe2    | O57    | 163.5(3) |
| O74    | Nb7    | O72    | 102.9(3)  | O26    | Fe2    | O53    | 76.4(3)  |
| O11    | Nb18   | O8     | 155.6(3)  | O28    | Fe2    | O16    | 96.8(3)  |
| O11    | Nb18   | O14    | 90.1(3)   | O28    | Fe2    | O26    | 91.6(3)  |
| O11    | Nb18   | O10    | 79.2(3)   | O28    | Fe2    | O38    | 97.9(3)  |

**Table S4. Selected Bond Valence Sum Values for the Fe Atoms and O Atoms Bound to Fe as OH Ligands in the Asymmetric Unit of 1**

| Atom | BVS value | Atom | BVS value |
|------|-----------|------|-----------|
| Fe1  | 3.06      | O2   | -0.7      |
| Fe2  | 3.13      | O21  | -0.68     |
| Fe3  | 3.06      | O42  | -0.71     |
| Fe4  | 3.00      | O61  | -0.7      |

**Table S5. ICP-OES and CHO Analysis Values Obtained for 1**

| Atom type | Relative abundance compared to Fe |
|-----------|-----------------------------------|
| Fe        | 1                                 |
| Nb        | 6.12                              |
| Li        | 5.97                              |
| O         | 31.44                             |
| H         | 22.97                             |

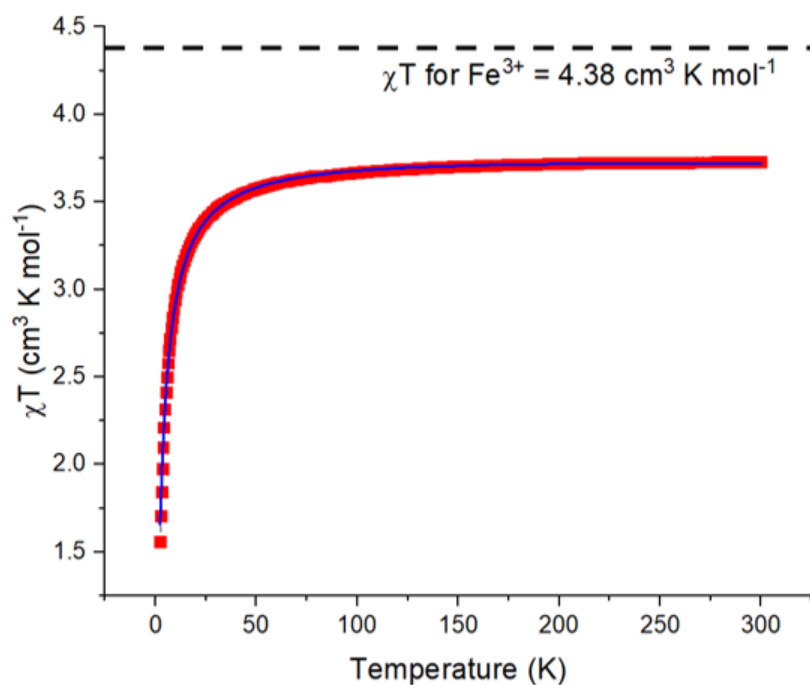

**Figure S1.** Magnetic susceptibility vs. temperature taken at H=5000 Oe is shown as  $\chi T(T)$ . The fitting by Curie-Weiss law is shown. The dash horizontal line show Curie constant values for non-interacting  $\text{Fe}^{3+}$  ions.

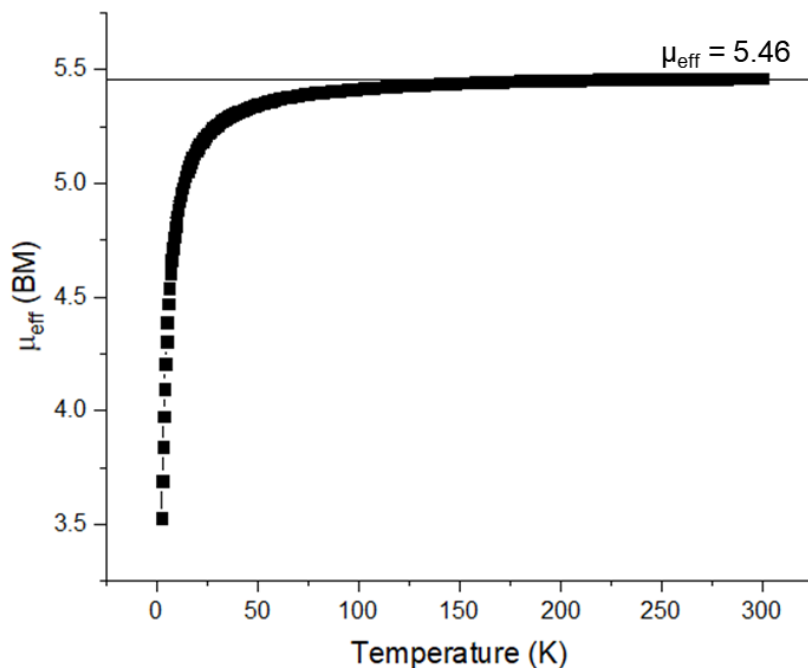

**Figure S2.** Effective magnetic moment curve,  $\mu_{\text{eff}}$ , as a function of temperature for compound **1**. The measured value of  $\mu_{\text{eff}} = 5.46$  is lower than expected for non-interacting  $\text{Fe}^{3+}$  ions of  $\mu = 5.92$ , indicating exchange interactions between the Fe centers.

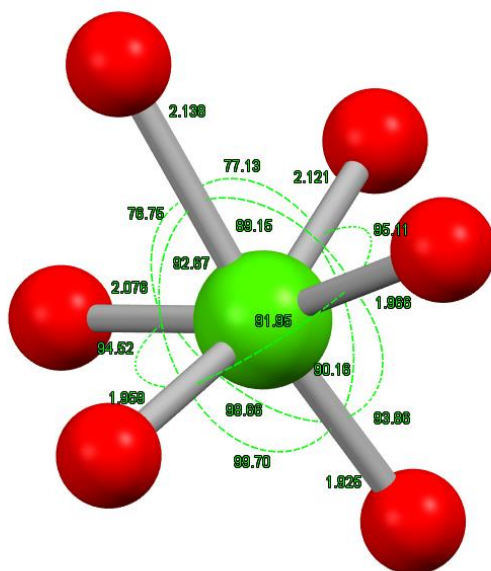

**Figure S3.** Distorted octahedral surrounding of one of the Fe-atom positions in the structure of **1**. The values of Fe-O distances and O-Fe-O angles are shown. The reason for the significant deviation from Curie's law lies in the strongly deformed octahedral oxygen environment of the Fe atoms.



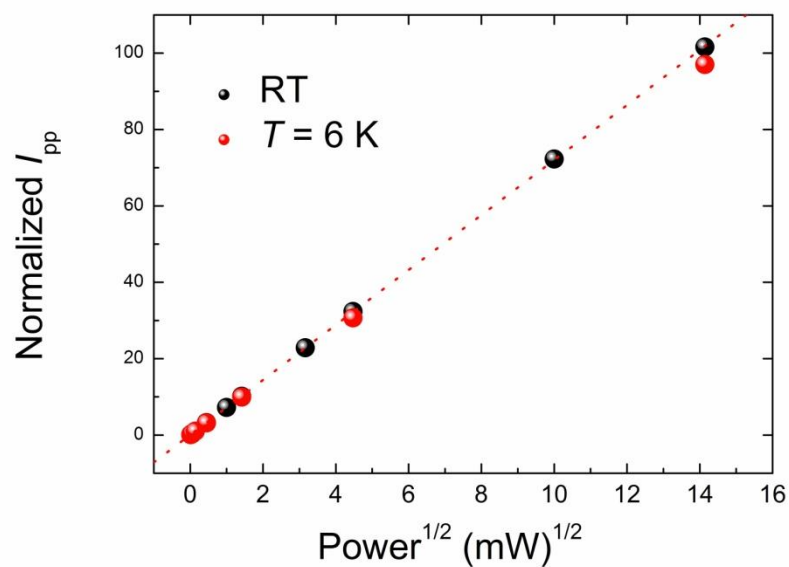

**Figure S4.** Microwave power saturation of the intense  $g_{\text{iso}} = 2.04$  line measured at two temperatures: black solid circles – room temperature (RT), red solid circles –  $T = 6\text{K}$ . Dashed red line represents best linear fit of the saturation curve obtained at RT.

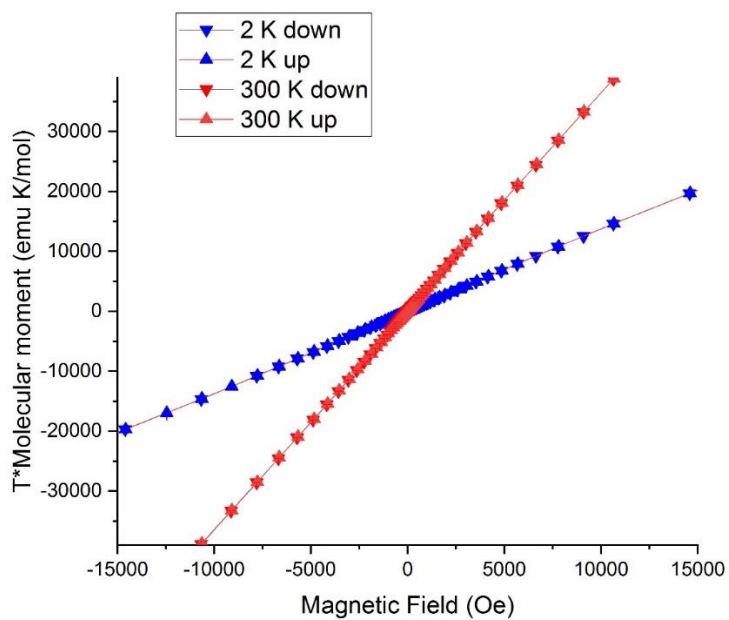

**Figure S5.** The product of temperature and molar magnetic moment vs. magnetic field at  $T = 2\text{K}$  and  $T = 300\text{K}$ . This figure shows that for fields less than 1 T, the field dependence of the magnetization can be considered linear over the entire temperature range. No hysteresis was found.

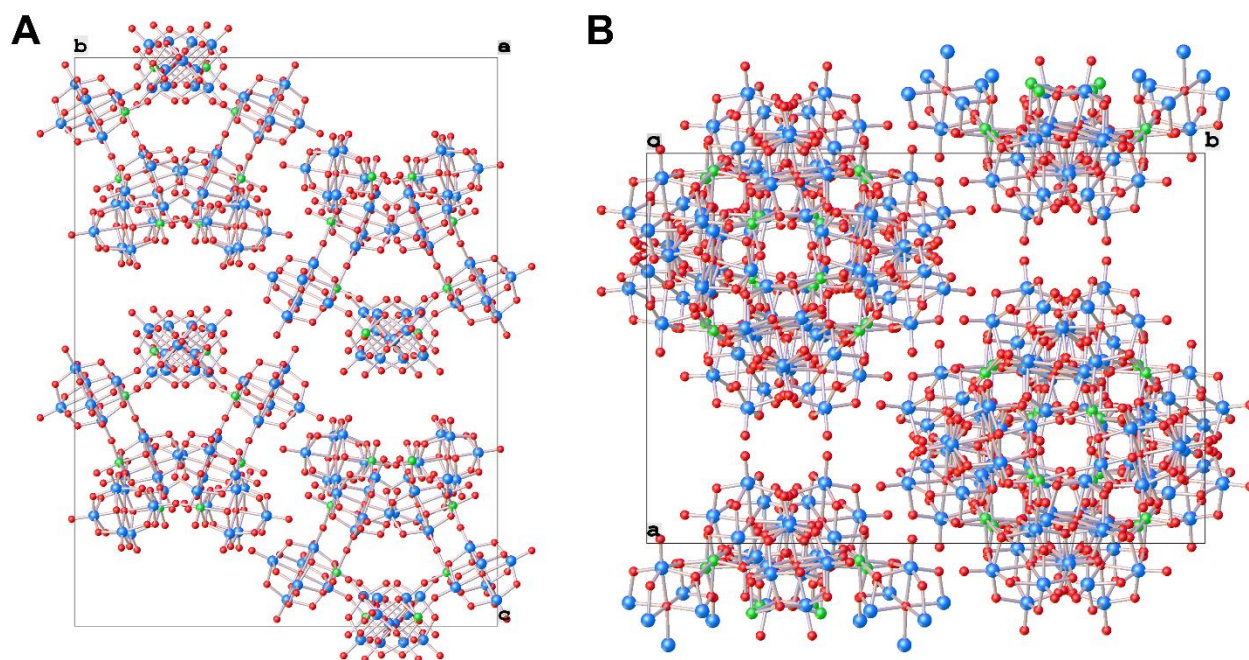

**Figure S6.** Crystal packing of **1**. A) View along  $[1\ 0\ 0]$ , B) View along  $[0\ 0\ 1]$ . Solvent water and Li counter-cations are omitted for clarity.

## References

1. M. Nyman, T. M. Anderson and P. P. Provencio, *Crystal Growth & Design*, 2009, **9**, 1036-1040.
2. Rigaku *CrysAlisPRO*, Yarnton, England, 2018.
3. G. Sheldrick, *Acta Crystallographica Section C*, 2015, **71**, 3-8.
4. *SCALE3 ABSPACK - An Oxford Diffraction program (1.0.4)*, Oxford Diffraction Ltd.: 2005.
5. G. Sheldrick, *Acta Crystallographica Section A*, 2015, **71**, 3-8.
6. S. Stoll and A. Schweiger, *Journal of Magnetic Resonance*, 2006, **178**, 42-55.
